# Supplementary material for: Pharyngeal Electrical Stimulation for Treatment of Poststroke Dysphagia: Individual Patient Data Meta-Analysis of Randomised Controlled Trials
Source: Hindawi journal article supplement (doi:10.1155/2015/429053), 2015-01-01
Supplement: f1 [file 429053.f1.pdf]

**SUPPLEMENTAL MATERIAL**

**Supplemental Table I.** Studies that were identified in structured searches but were excluded, and criteria for exclusion.

| Study Reference                                                                                             | Reason for Exclusion   |
|-------------------------------------------------------------------------------------------------------------|------------------------|
| Archer 2013 <sup>1</sup>                                                                                    | • Non-RCT              |
| Bulow 2008 <sup>2</sup>                                                                                     | • Non-PES study        |
| Burnett 2005 <sup>3</sup>                                                                                   | • Non-PES study        |
|                                                                                                             | • Non-RCT              |
|                                                                                                             | • Non-stroke           |
| Byung-Mo 2010 <sup>4</sup>                                                                                  | • Non-RCT              |
| Clark 2009 <sup>5</sup>                                                                                     | • Non-RCT              |
|                                                                                                             | • Systematic review    |
| Heijnen 2012 <sup>6</sup>                                                                                   | • Non-PES study        |
|                                                                                                             | • Non-stroke           |
| Jayasekeran 2011 <sup>7</sup>                                                                               | • Non-RCT              |
|                                                                                                             | • Non-stroke           |
| Lim 2009 <sup>8</sup>                                                                                       | • Non-PES study        |
| Long 2013 <sup>9</sup>                                                                                      | • Non-PES study        |
|                                                                                                             | • Non-stroke           |
| Ludlow <sup>10</sup>                                                                                        | • Non-RCT              |
| Michou 2014 <sup>11</sup>                                                                                   | • Non-RCT              |
|                                                                                                             | • Chronic stroke       |
| Restivo 2013 <sup>12</sup>                                                                                  | • Non-stroke           |
| Restivo 2014 <sup>13</sup>                                                                                  | • Non-stroke           |
|                                                                                                             | • Not PES              |
| Suntrup 2013 <sup>14</sup>                                                                                  | • Non-RCT              |
| Rofes 2013 <sup>15</sup>                                                                                    | • Non-RCT              |
| Rogus-Pulia 2013 <sup>16</sup>                                                                              | • Non-RCT              |
|                                                                                                             | • Review               |
| Speyer 2010 <sup>17</sup>                                                                                   | • Non-RCT              |
|                                                                                                             | • Systematic review    |
| STEPS 2015                                                                                                  | • Ongoing RCT          |
| <a href="http://www.phagenesis.com/clinical/STEPS-study">http://www.phagenesis.com/clinical/STEPS-study</a> |                        |
| Tan 2013 <sup>18</sup>                                                                                      | • Not an PES RCT       |
|                                                                                                             | • Multiple aetiologies |

PES: Pharyngeal electrical stimulation; RCT: randomised controlled trial

**Supplemental Table II.** Mean penetration aspiration score (PAS) and dysphagia severity rating scale (DSRS) before and after treatment in the active and sham groups in the 3 trials. Patients with both baseline and 2 week mean PAS are included. Comparison by t test.

| Timing      | PAS           |               |               | DSRS          |               |               |      |
|-------------|---------------|---------------|---------------|---------------|---------------|---------------|------|
|             | Trial 1<br>19 | Trial 2<br>19 | Trial 3<br>20 | Trial 1<br>19 | Trial 2<br>19 | Trial 3<br>20 |      |
| Active      | Before        | 4.8           | 4.6           | 4.5           | -             | 6.4           | 7.8  |
|             | After         | 3.7           | 3.2           | 2.6           | -             | 2.5           | 4.4  |
|             | Difference    | -1.0          | -1.4          | -1.9          | -             | -3.9          | -3.4 |
| Sham        | Before        | 4.3           | 3.9           | 3.9           | -             | 5.6           | 6.8  |
|             | After         | 4.8           | 3.8           | 4.3           | -             | 4.8           | 5.0  |
|             | Difference    | +0.5          | -0.1          | +0.4          | -             | -0.8          | -1.8 |
| Active-sham | Difference    | -1.5          | -1.3          | -2.3          | -             | -3.0          | -1.5 |
|             | p             | 0.017         | 0.061         | 0.22          | -             | 0.11          | 0.11 |

**Supplemental Figure I.** Flow diagram of search for trials

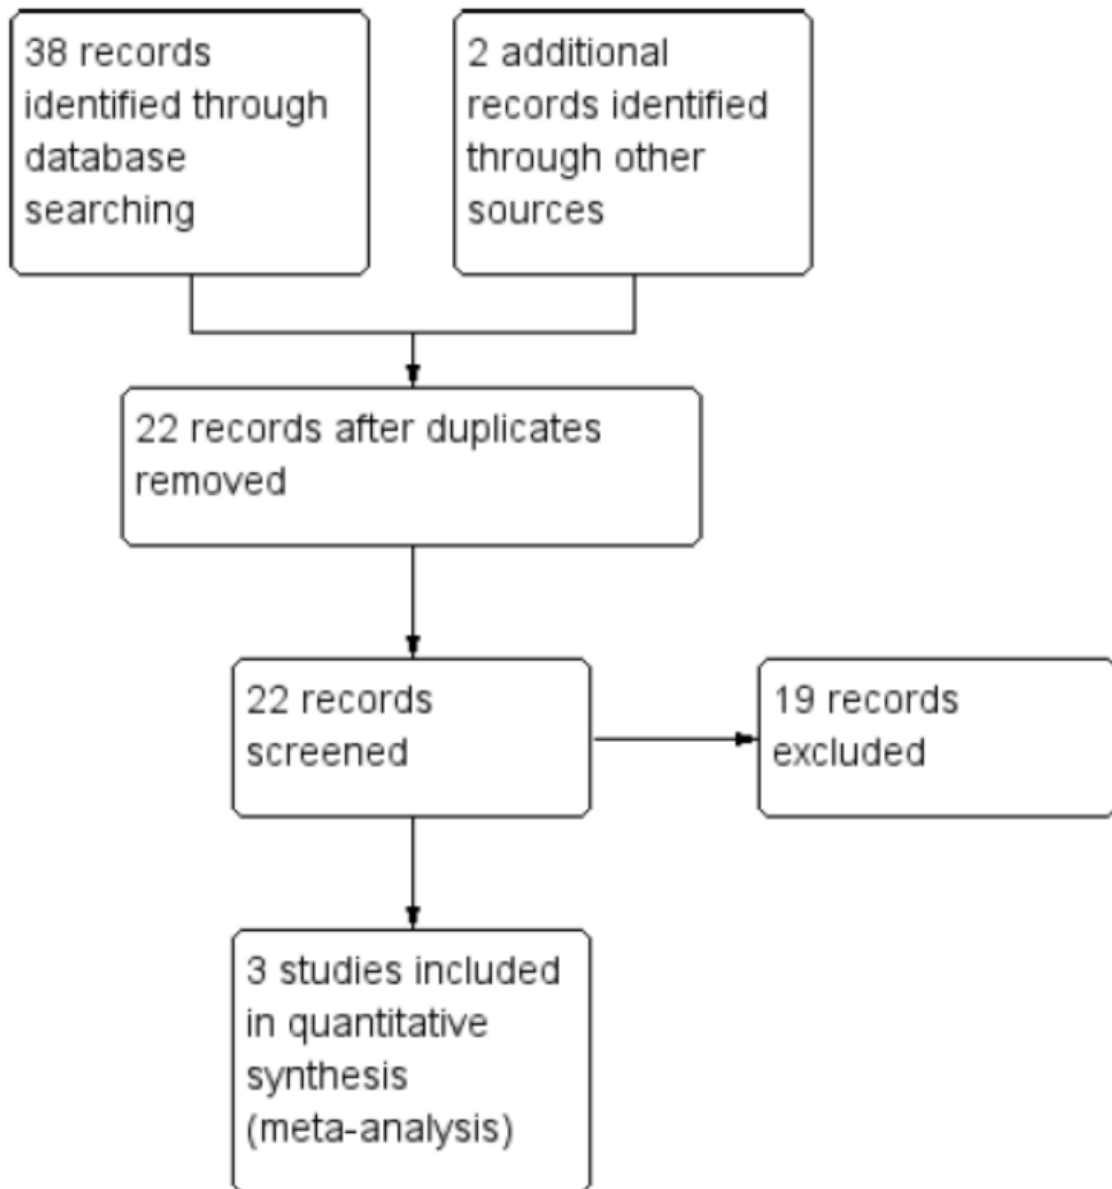

**Supplemental Figure II.** Dysphagia Severity Rating Scale, in subgroups (as for penetration aspiration score in Figure 2)

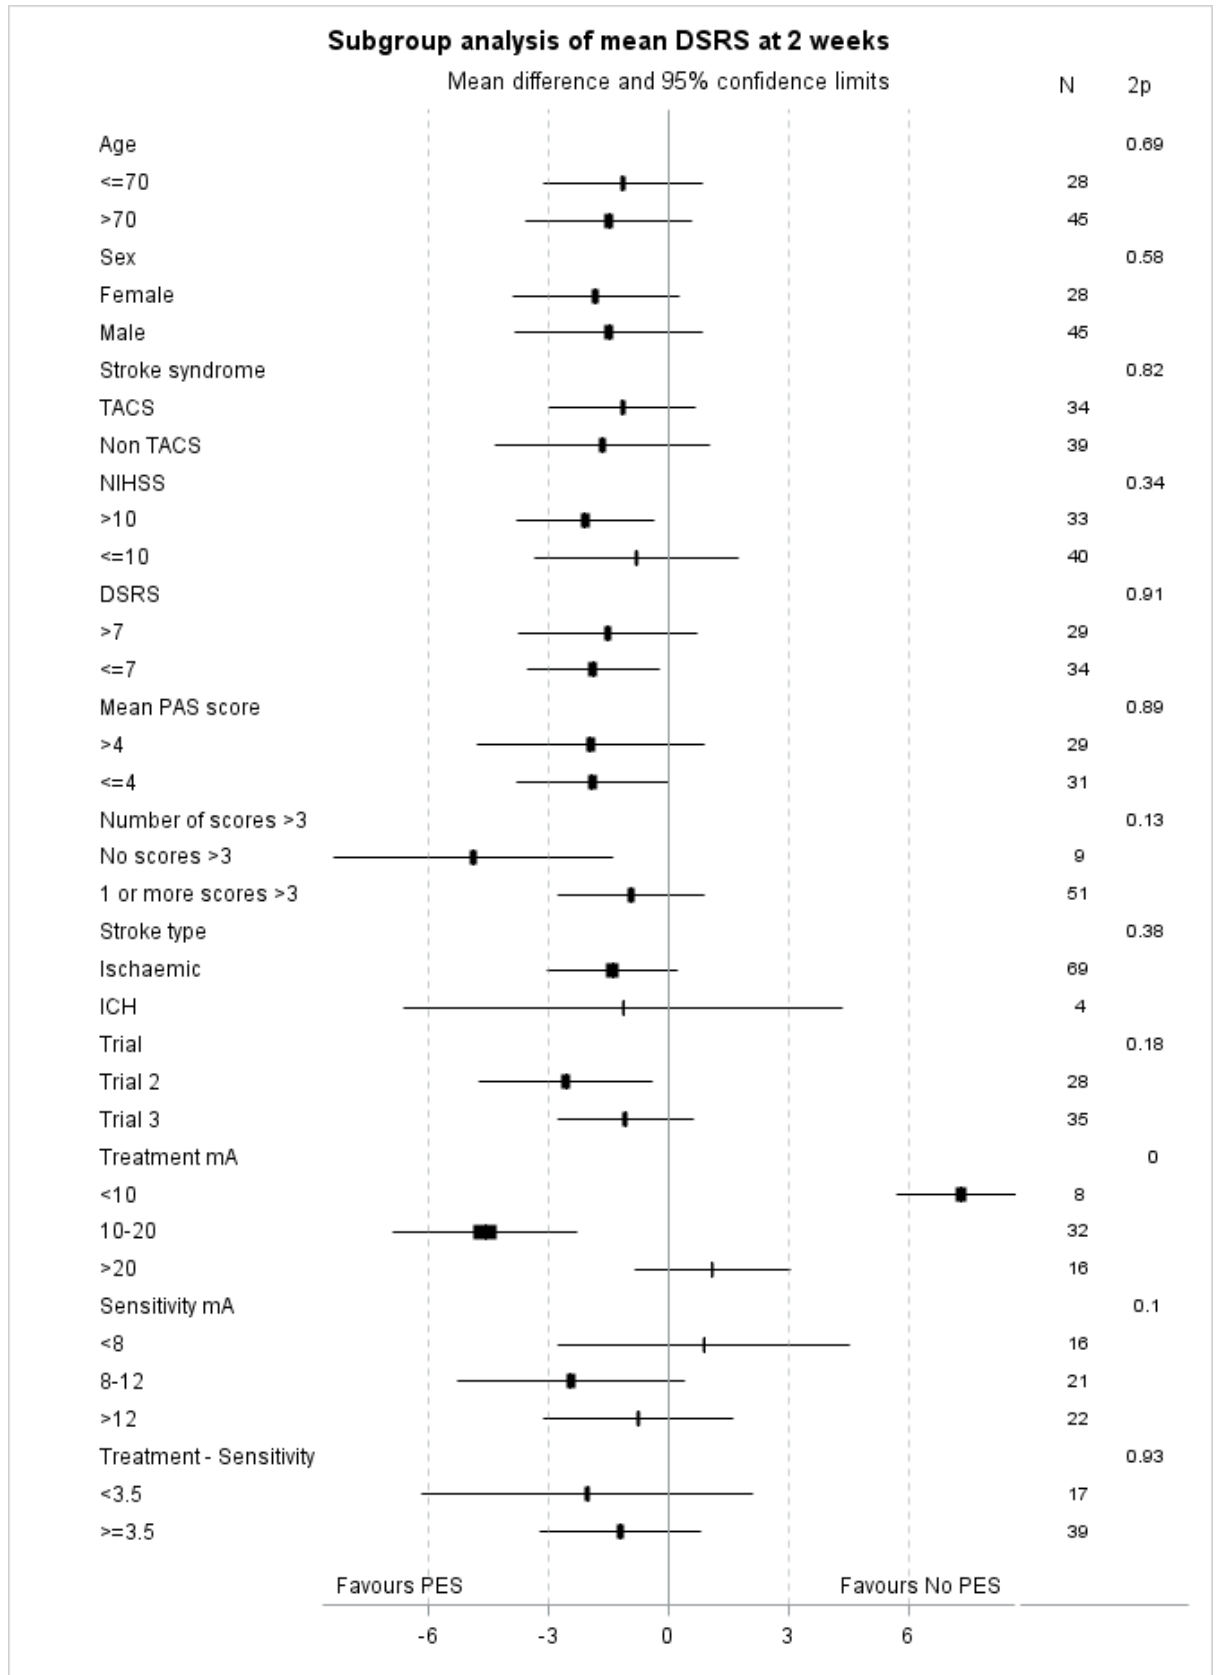

**Supplemental Figure III.** Box and whisker plot of length in stay in hospital after randomisation, by source trial. Comparison of PES versus no PES by multiple linear regression with adjustment, overall mean difference -16.2 (95% CI -36.2, 3.7;  $p=0.11$ ). Note: one patient randomised to sham PES with length of stay of 365 days excluded to make figure more clear.

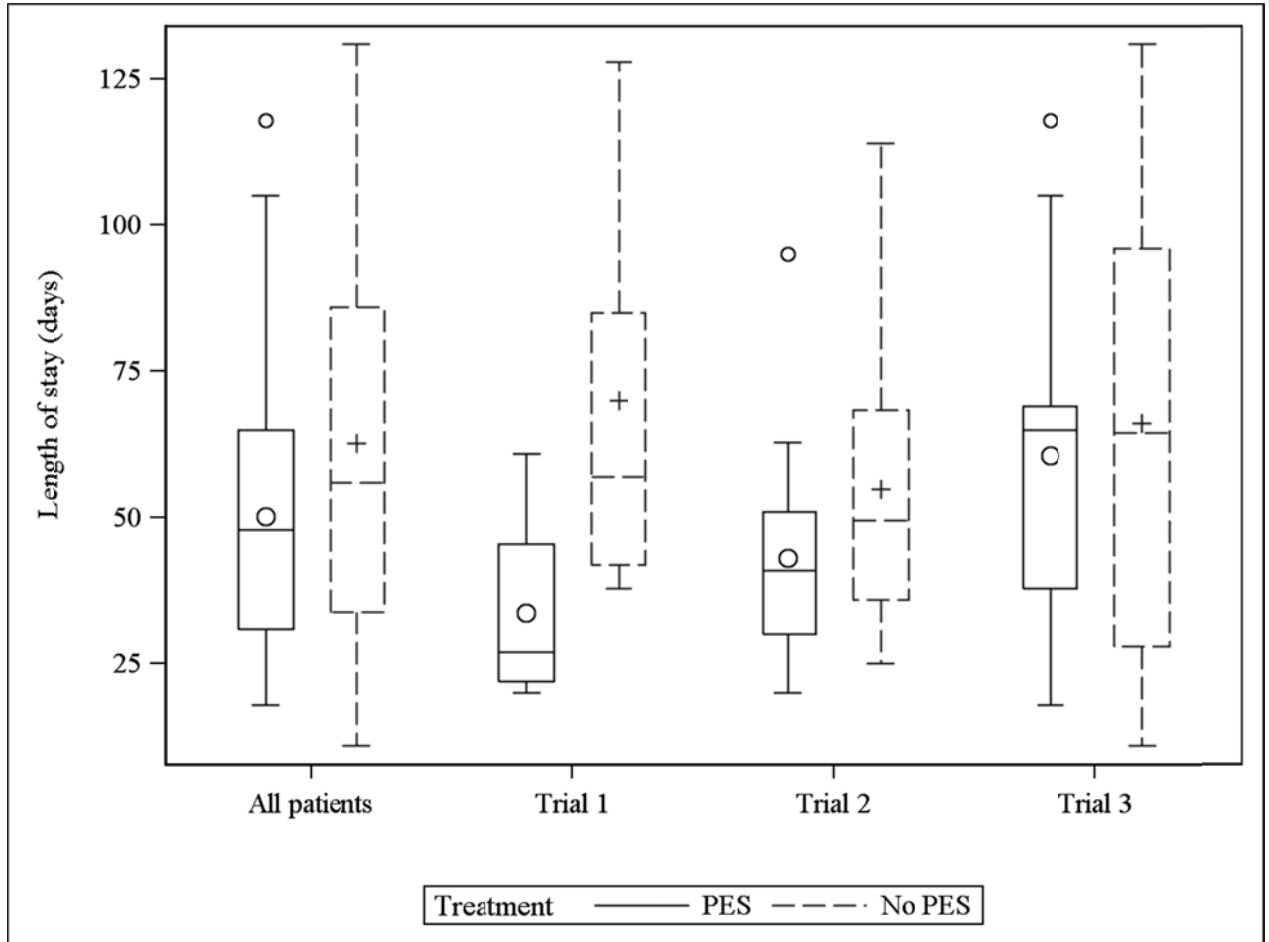

## Supplemental References

1. Archer S, Wellwood I, Smith C, Newham D. Dysphagia therapy in stroke: A survey of speech and and language therapists. *International Journal of Language and Communication Disorders*. 2013; 48:283-296
2. Bülow M, Speyer R, Baijens L, Woisard V, Ekberg O. Neuromuscular electrical stimulation (nmes) in stroke patients with oral and pharyngeal dysfunction. *Dysphagia*. 2008;23:302-309
3. Burnett T, Mann E, Stoklosa J, Ludlow C. Self-triggered functional electrical stimulation during swallowing. *Journal of Neurophysiology*. 2005; 94:4011-4018
4. Byung-Mo O, Nam-Jong P. *Management of swallowing difficulty in pharyngeal diseases*. Nova Science Publishers, Inc.; 2010.
5. Clark H, Lazarus C, Arvedson J, Schooling T, Frymark T. Evidence-based systematic review: Effects of neuromuscular electrical stimulation on swallowing and neural activation. *American Journal of Speech and Language Pathology*. 2009;18:361-375
6. Heijen B, Speyer R, Baijens L, Bogaardt H. Neuromuscular electrical stimulation versus traditional therapy in patients with parkinson's disease and oropharyngeal dysphagia: Effects on quality of life. *Dysphagia*. 2012;27:336-345
7. Jayasekeran V, Pendleton N, Holland G, Payton A, Jefferson S, Michou E, et al. Val66met in brain-derived neurotrophic factor affects stimulus-induced plasticity in the human pharyngeal motor cortex. *Gastroenterology*. 2011;141:827-836 e821-823
8. Lim KB, Lee HJ, Lim SS, Choi YI. Neuromuscular electrical and thermal-tactile stimulation for dysphagia caused by stroke: A randomized controlled trial. *J Rehabil Med*. 2009;41:174-178
9. Long Y, Wu X. A randomized controlled trial of combination therapy of neuromuscular electrical stimulation and balloon dilatation in the treatment of radiation-induced dysphagia in nasopharyngeal carcinoma patients. *Disability and rehabilitation*. 2013;35:450-454
10. Ludlow C. Electrical neuromuscular stimulation in dysphagia: Current status. *Current Opinion in Otolaryngology & Head and Neck Surgery*. 2010;18:159-164
11. Michou E, Mistry S, Jefferson S, Tyrrell P, Hamdy S. Characterizing the mechanisms of central and peripheral forms of neurostimulation in chronic dysphagic stroke patients. *Brain Stimulation*. 2014;7:66-73
12. Restivo D, Casabona A, Centonze D, Marchese-Ragona R, Maimone D, Pavone A. Pharyngeal electrical stimulation for dysphagia associated with multiple sclerosis: A pilot study. *Brain Stimulation*. 2013;6:418-423
13. Restivo D, Casabono A, Marchese-Ragona R. Transcranial direct current stimulation (tdcs) for dysphagia associated to multiple sclerosis. *Clinical Neurophysiology*. 2014;125:S205
14. Suntrup S. Motor cortical reorganization in dysphagia following stroke. *Klinische Neurophysiologie*. 2013;44:247-256
15. Rofes L, Vilardell N, Clave P. Post-stroke dysphagia: Progress at last. *Neurogastroenterology and Motility*. 2013;25:278-282

16. Rogus-Pulia N, Robbins J. Approaches to the rehabilitation of dysphagia in acute poststroke patients. *Seminars in Speech and Language*. 2013;34:154-169
17. Speyer R, Baijens L, Heijen M, Zwijnenberg I. Effects of therapy in oropharyngeal dysphagia by speech and language therapists: A systematic review. *Dysphagia*. 2010;25:40-65
18. Tan C, Liu Y, Li W, Liu J, Chen L. Transcutaneous neuromuscular electrical stimulation can improve swallowing function in patients with dysphagia caused by non-stroke diseases: A meta-analysis. *Journal of Oral Rehabilitation*. 2013;40:472-480
19. Jayasekeran V, Singh S, Tyrrell P, Michou E, Jefferson S, Mistry S, et al. Adjunctive functional pharyngeal electrical stimulation reverses swallowing disability after brain lesions. *Gastroenterology*. 2010;138:1737-1746
20. Vasant D, Michou E, Tyrrell P, Jayasekeran V, Mistry S, O'Leary N, et al. Oc-063 pharyngeal electrical stimulation (pes) in dysphagia post-acute stroke: A double blind, randomised trial. *Gut*. 2014;63
